## Symptoms reported in calls to emergency medical services 24 hours prior to out-of-hospital cardiac arrest

F. Gnesin<sup>1</sup>, E.H.A. Mills<sup>2</sup>, A.L. Moeller<sup>1</sup>, B. Jensen<sup>3</sup>, N. Zyliftari<sup>4</sup>, K.B. Ringgren<sup>2</sup>, H. Boeggild<sup>3</sup>, H.C. Christensen<sup>5</sup>, S.N.F. Blomberg<sup>5</sup>, F. Lippert<sup>6</sup>, F. Folke<sup>6</sup>, C. Torp-Pedersen<sup>1</sup>

<sup>1</sup>Nordsjællands Hospital, Hilleroed, Denmark; <sup>2</sup>Aalborg University Hospital, Aalborg, Denmark; <sup>3</sup>Aalborg University, Aalborg, Denmark; <sup>4</sup>Herlev and Gentofte Hospital, Copenhagen, Denmark; <sup>5</sup>Copenhagen Emergency Medical Services, Copenhagen, Denmark; <sup>6</sup>University of Copenhagen, Copenhagen, Denmark

**Funding Acknowledgement:** Type of funding sources: Foundation. Main funding source(s): The Danish Heart Foundation Research Grant from Nordsjællands Hospital

**Background and purpose:** It remains unknown whether patients with out-of-hospital cardiac arrest (OHCA) experience prodromal symptoms. We aimed to investigate symptoms reported by patients with OHCA contacting emergency medical services (EMS) within 24 hours prior to arrest.

**Methods:** We linked OHCA occurring from 2016 through 2018 to corresponding emergency calls occurring within 24 hours prior to arrest (defined as "pre-arrest calls"). These calls were included and evenly split and evaluated by authors.

**Results:** Among 4071 patients with OHCA, 481 patients (11.8%) had pre-arrest calls (59.9% males, median age 74 years) with a total of 539 calls. Figure 1 shows the reported symptoms across calls. The most commonly

reported symptoms were breathing problems (59.4%), confusion (23.0%), unconsciousness (20.2%), chest pain (19.5%) and paleness (19.1%). The most common co-occurring symptom pairs were breathing problems in combination with paleness (14.5%), confusion (14.1%), unconsciousness (13.5%), sweating (13.0%) and chest pain (11.9%), respectively. An urgent response was dispatched in 68.7% of calls containing breathing problems compared to 83.0% of calls containing chest pain.

**Conclusion:** Among patients with OHCA, 11.8% had a call to EMS within 24 hours prior to arrest and breathing problems was the most commonly reported symptom occurring in 59.4% of calls.

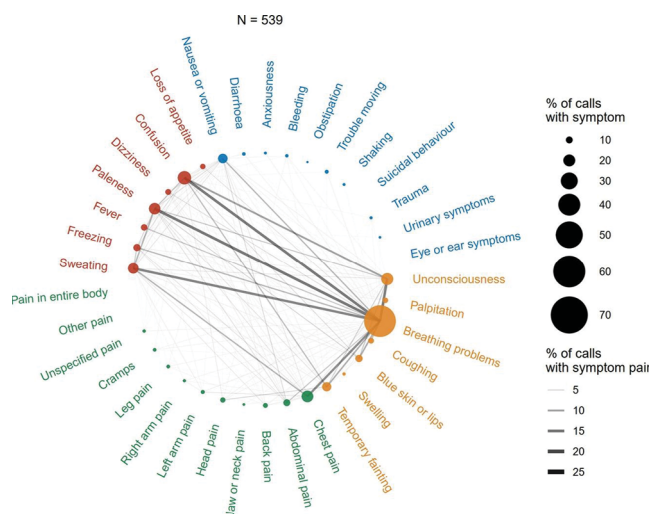

Figure 1
